# Supplementary material
Source: PubMed Central journal article supplement (PMC7376819)

Fig.S5C, TPT1 western blot

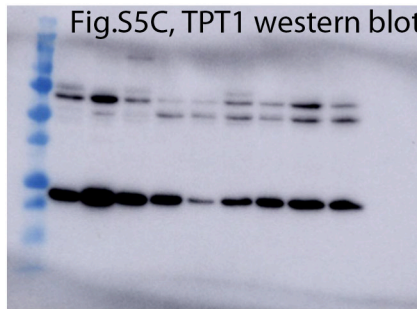

Fig.S5C, GAPDH western blot

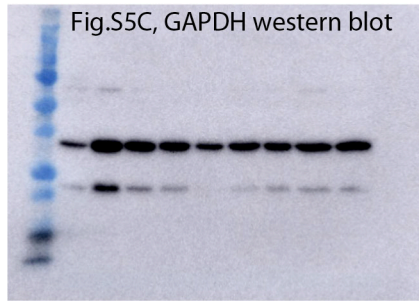

Fig.S5E, TPT1 western blot

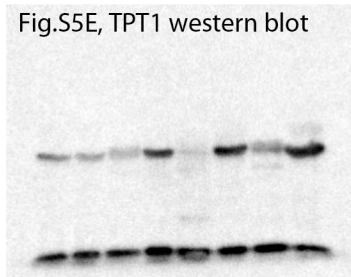

Fig.S5E, GAPDH western blot

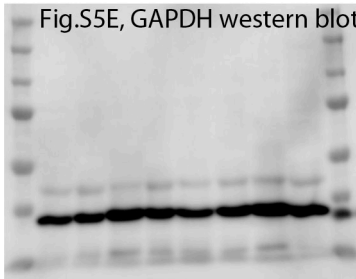

Supplement: NIHMS1541637-supplement-1541637_Supp_FigS5.pdf [file NIHMS1541637-supplement-1541637_Supp_FigS5.pdf]
