# Supplementary material
Source: PubMed Central journal article supplement (PMC7376819)

Fig.S2B, SNORA31 Northern blot

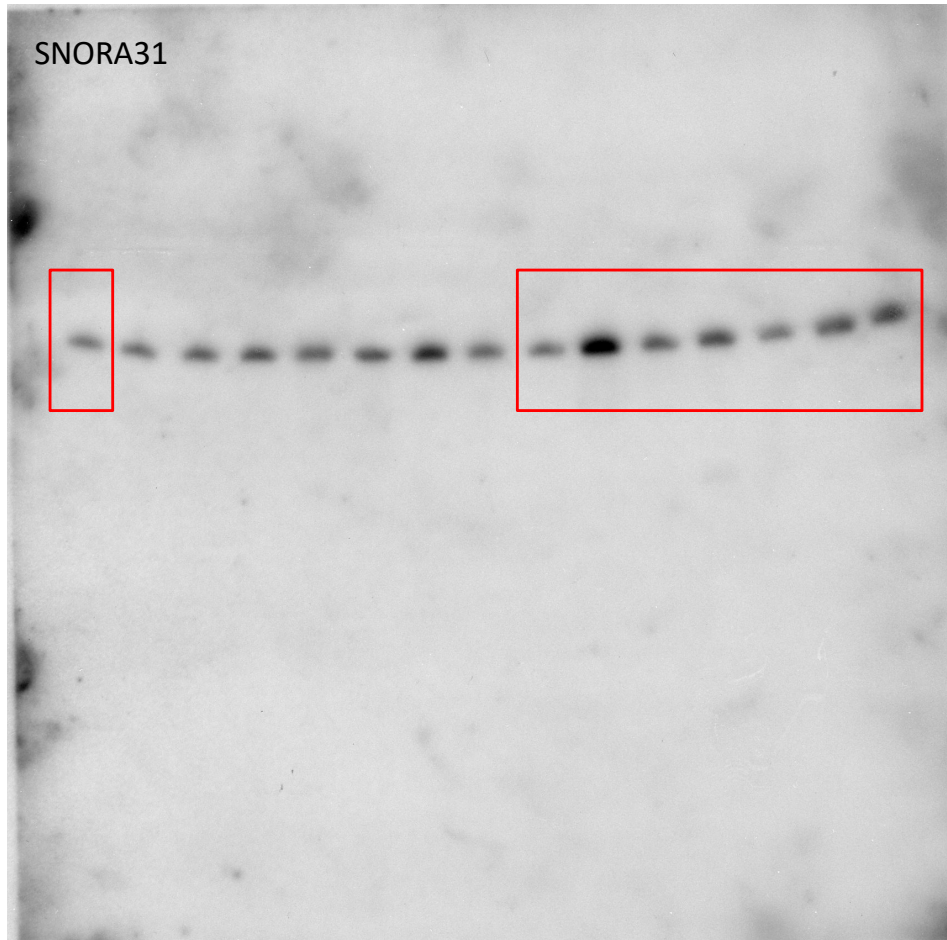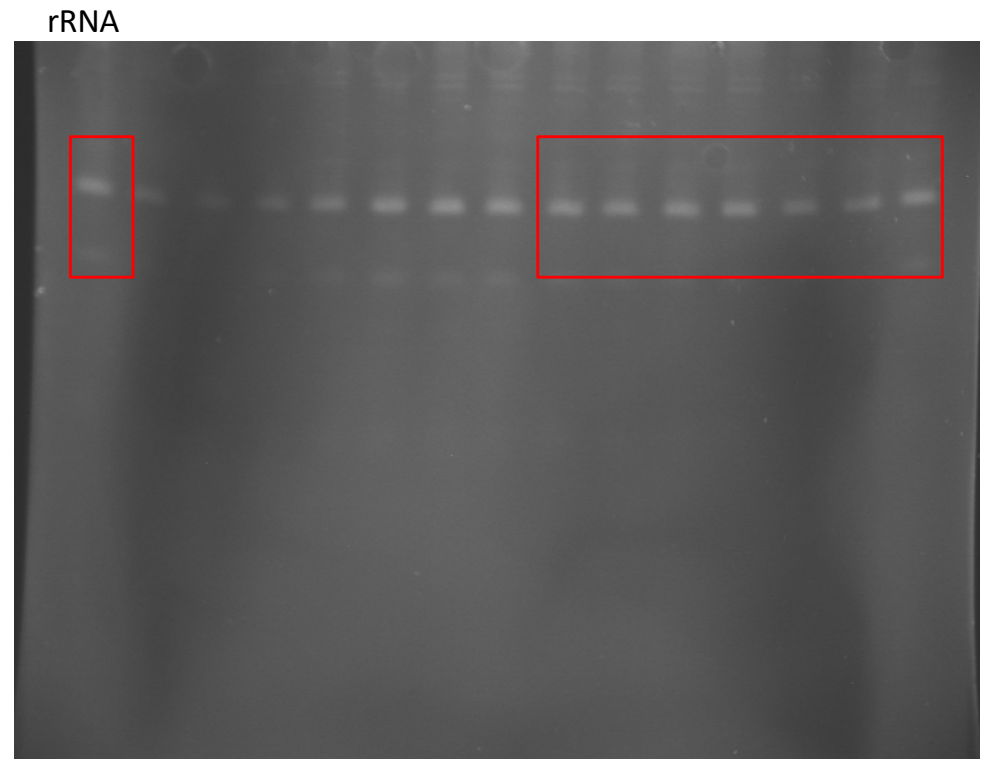

Fig.S2K, TPT1 western blot

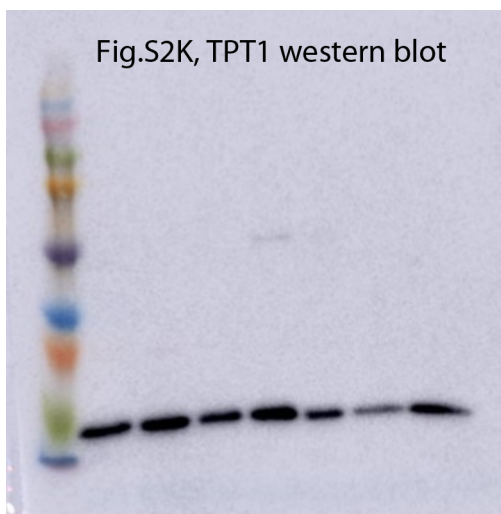

Fig.S2K, GAPDH western-blot

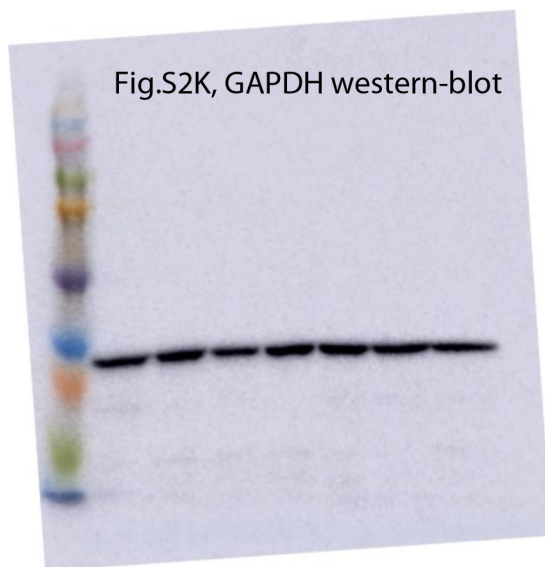

Supplement: NIHMS1541637-supplement-1541637_Supp_FigS2.pdf [file NIHMS1541637-supplement-1541637_Supp_FigS2.pdf]

Fig.S3B, TPT1 western blot

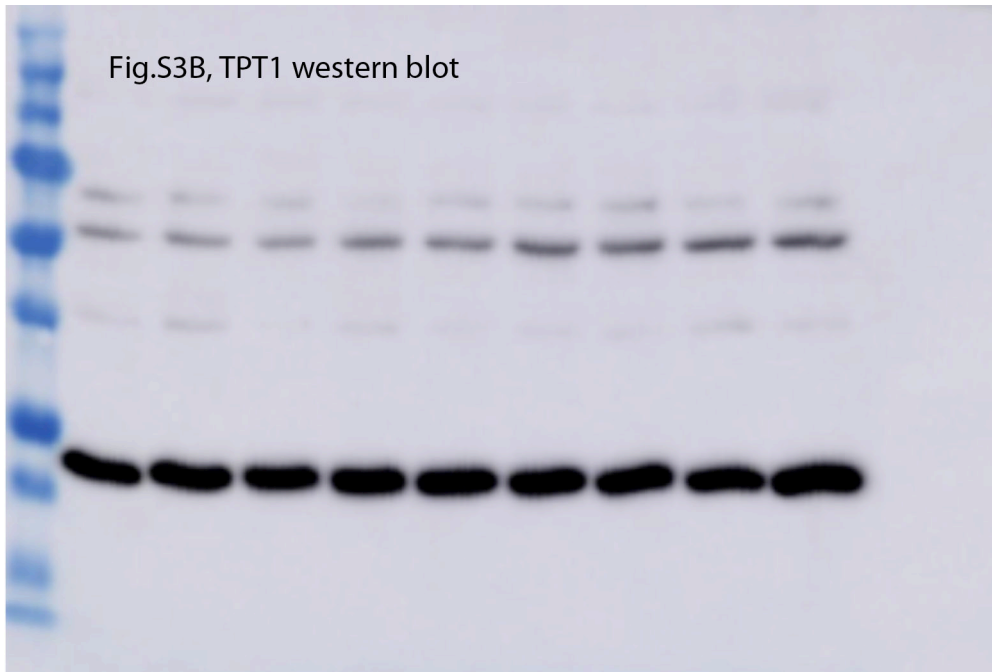

Fig.S3B, GAPDH western blot

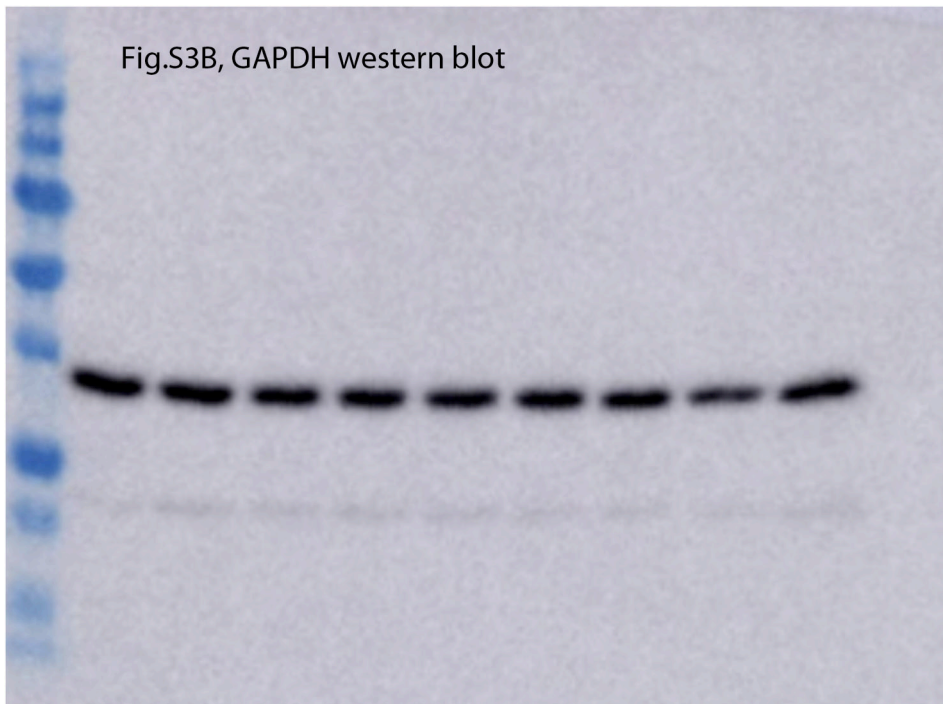

Supplement: NIHMS1541637-supplement-1541637_Supp_FigS3.pdf [file NIHMS1541637-supplement-1541637_Supp_FigS3.pdf]
